# Supplementary material for: A Rationally Designed Hsp70 Variant Rescues the Aggregation-Associated Toxicity of Human IAPP in Cultured Pancreatic Islet β-Cells
Source: MDPI journal article supplement (doi:10.3390/ijms19051443), 2018-05-12
Supplement: s1 [file s1]

## **SUPPLEMENTARY INFORMATION**

### **A rationally designed Hsp70 variant rescues the aggregation-associated toxicity of human IAPP in cultured pancreatic islet $\beta$ -cells**

Marie Nicole Bongiovanni, Francesco Antonio Aprile<sup>\*</sup>, Pietro Sormanni and Michele  
Vendruscolo<sup>\*</sup>

*Centre for Misfolding Diseases, Department of Chemistry, University of Cambridge,  
Cambridge, CB2 1EW, UK*

Correspondence to: F. A. A. (faa25@cam.ac.uk) or M. V. (mv245@cam.ac.uk)

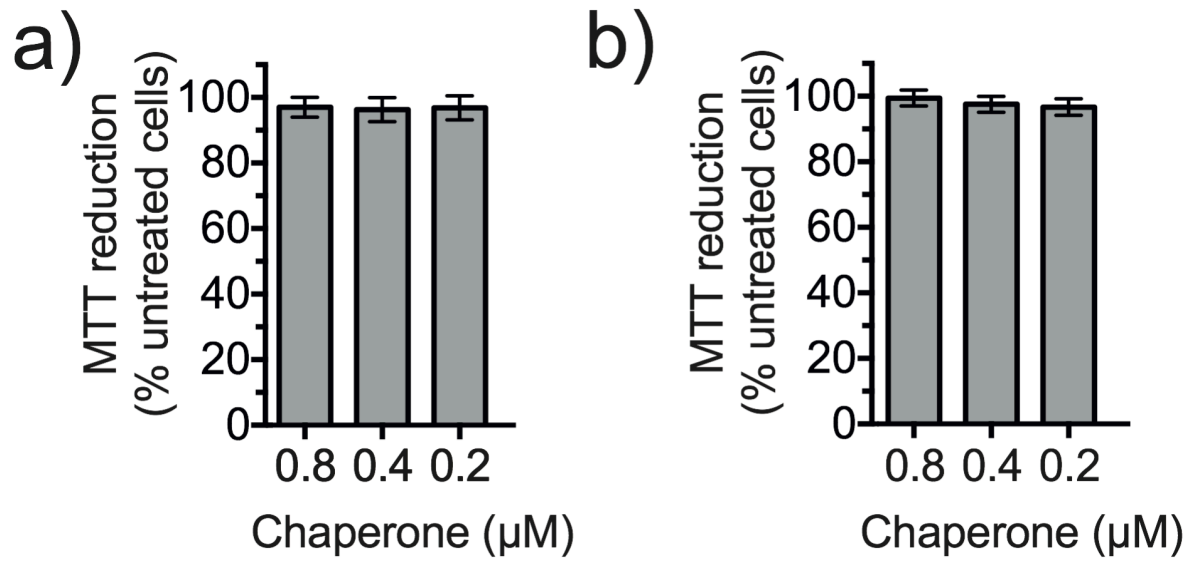

**Figure S1.** Viability of RIN-m5F cells in the presence of increasing concentrations of Hsp70 variants, but not of hIAPP, using the MTT reduction assay. Cells were incubated for 24 h with: **(a)** Hsp70 WT or **(b)** GHsp70-hIAPP at the molar concentrations used in **Figure 2a**. Data are the mean  $\pm$  SEM ( $n = 5$ ) and are representative of two different experiments conducted on separate days. Cells lysed with Triton X-100 were used as a negative control to assess the minimum MTT reduction ( $\sim 2 \pm 0.5$  % of untreated cells).

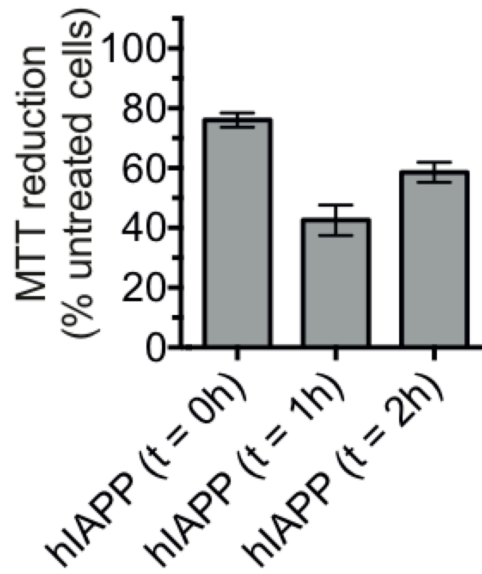

**Figure S2.** Toxicity of hIAPP on RIN-m5F cells using the MTT reduction assay. Cells were incubated for 24 h with hIAPP suspended at 10  $\mu$ M in cell media. The media was added to the cells immediately ( $t = 0$  h) or after pre-incubation at 37  $^{\circ}$ C at quiescent conditions for 1 hour ( $t = 1$ h) or 2 hours ( $t = 2$ h). Data are the mean  $\pm$  SEM ( $n = 5$ ) and are representative of two different experiments conducted on separate days. Cells lysed with Triton X-100 were used as a negative control to assess the minimum MTT reduction ( $\sim 3 \pm 0.5$  % of untreated cells).

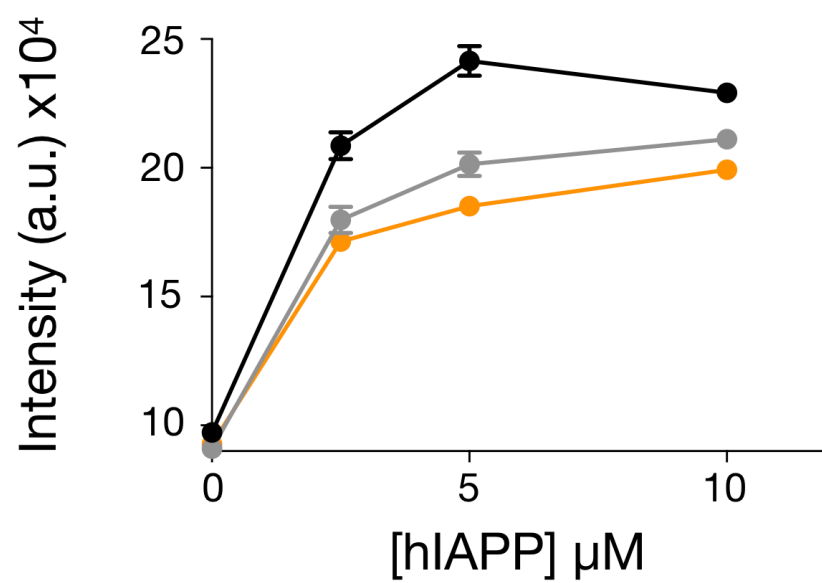

**Figure S3.** ELISA binding assay of hIAPP (2.5, 5, 10  $\mu\text{M}$ ) with GHsp70-hIAPP (black), Hsp70 WT (grey) and GHsp70-A $\beta$  (yellow) variants.

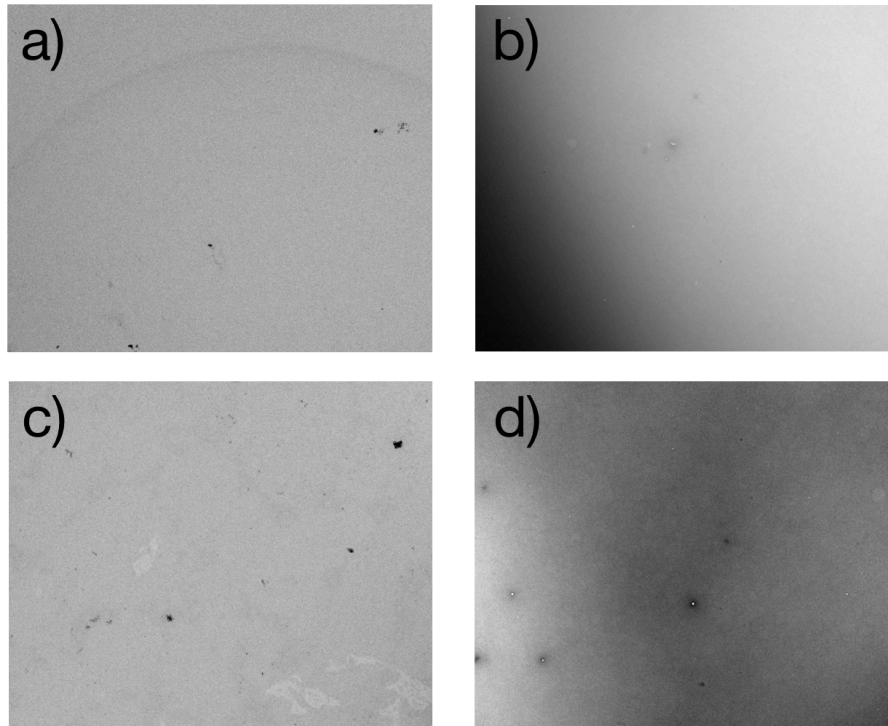

**Figure S4.** (a) TEM image of a solution containing 10  $\mu\text{M}$  hIAPP alone at the beginning of the aggregation reaction. (b-d) TEM images of solutions containing 0.8  $\mu\text{M}$  Hsp70 WT (b), GHsp70-A $\beta$  (c), or GHsp70-hIAPP (d) in the absence of hIAPP after 15 hours of incubation at 37  $^{\circ}\text{C}$ .
